# Supplementary material
Source: PubMed Central journal article supplement (PMC3734887)
Supplement: chest_144_2_498_ds01.pdf [file chest_144_2_498_ds01.pdf]

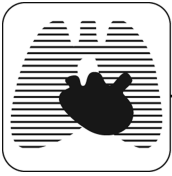

### Acquired Cystic Fibrosis Transmembrane Conductance Regulator Dysfunction in the Lower Airways in COPD

Mark T. Dransfield, MD; Andrew M. Wilhelm, MD; Brian Flanagan, MD; Clifford Courville, MD; Sherry L. Tidwell, RRT; S. Vamsee Raju, PhD; Amit Gaggar, MD, PhD; Chad Steele, PhD; Li Ping Tang, DVM; Bo Liu, MD; and Steven M. Rowe, MD, MSPH

e-Figure 1. Consort Diagram

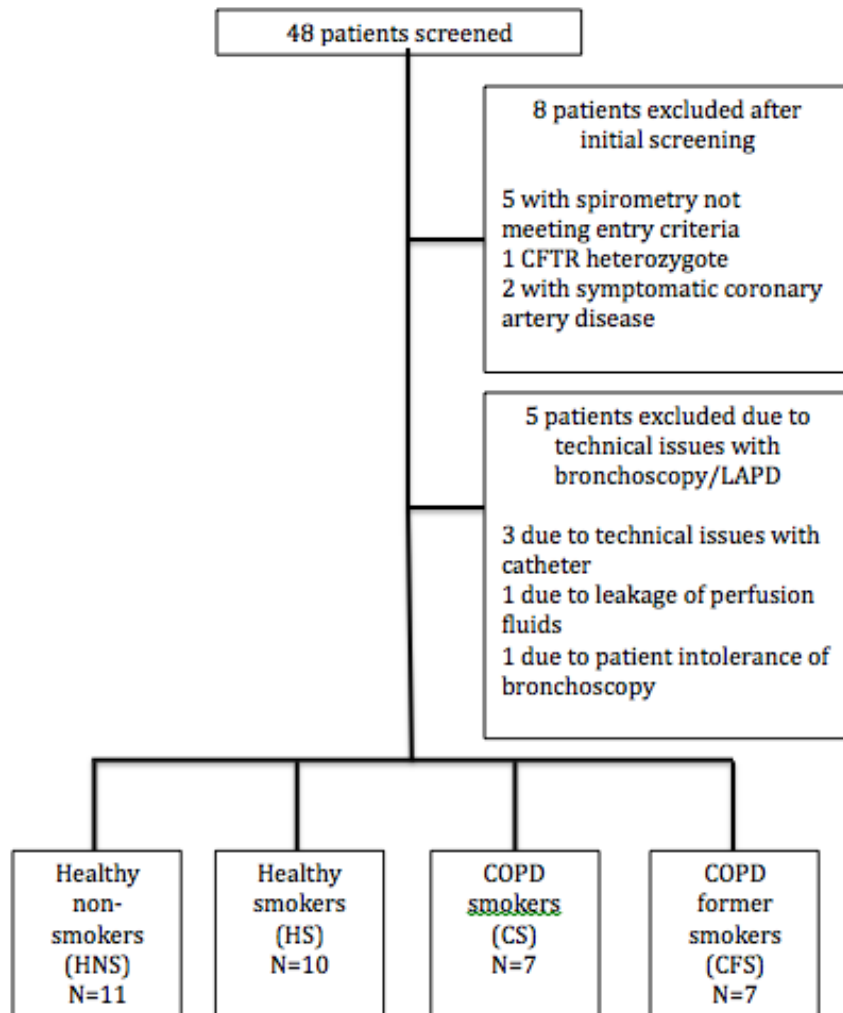

Online supplements are not copyedited prior to posting.



**e-Table 1.** Cytokine concentrations in BAL fluid.

| Analyte<br>(pg/ml, SD) | Healthy<br>Never<br>Smokers | Healthy<br>Smoker | COPD<br>Smoker | COPD<br>Former<br>Smoker | P Value<br>(ANOVA) | Pairwise<br>Analysis<br>P<0.05 |
|------------------------|-----------------------------|-------------------|----------------|--------------------------|--------------------|--------------------------------|
| EGF                    | 209.2±149.2                 | 210.6±97.47       | 221±138        | 257.4±169.7              | 0.81               |                                |
| Eoxatin                | 13.14±4.49                  | 11.61±1.21        | 11.56±4.03     | 13.35±4.94               | 0.62               |                                |
| Fractalkine            | 7.82±5.12                   | 11±12.27          | 4.278±1.52     | 4.577±1.28               | 0.062              | HNS-HS                         |
| G-CSF                  | 17.82±14.39                 | 15±10.8           | 9.8±8.69       | 16±18.66                 | 0.57               | HNS-CS                         |
| GM-CSF                 | 17.21±5.63                  | 16.22±5.45        | 15.8±7.36      | 15.18±6.16               | 0.83               |                                |
| GRO                    | 2711±2249                   | 2308±1641         | 2288±3019      | 3248±3062                | 0.78               |                                |
| IFN-g                  | 15.24 ±7.26                 | 35.38±41.65       | 10.56±3.37     | 12.08±4.38               | 0.02               | HNS-HS,<br>HS-CS, HS-<br>CFS   |
| IFN-α2                 | 8.118±5.07                  | 7.77±4.17         | 6.05±2.58      | 8.03±4.63                | 0.66               |                                |
| IL-1 RA                | 16.26±4.9                   | 26.79±10.63       | 18.55±15.4     | 17.5±7.94                | 0.11               | HNS-HS                         |
| IL-10                  | 4.30±1.1                    | 4.56±0.62         | 4.16±0.70      | 4.60±1.04                | 0.66               |                                |
| IL-12 p70              | 6.88±1.92                   | 5±2.23            | 4.05±1.86      | 5.5±2.66                 | 0.016              | HNS-HS,<br>HNS-CS,<br>HNS-CFS  |
| IL-17                  | 16.53±26.75                 | 827.3±2323        | 195.5±588      | 9.346±1.91               | 0.22               | HNS-HS                         |
| IL-1α                  | 24.34±18.63                 | 20.88±7.16        | 15.19±2.56     | 17.36±5.9                | 0.27               |                                |
| IL-6                   | 11.44±6.2                   | 11.75±5.92        | 26.5±40.76     | 14.15±12.2               | 0.27               |                                |
| IL-7                   | 5.58±2.74                   | 5.62±1.5          | 4.10±1.66      | 4.65±1.44                | 0.24               |                                |
| IL-8                   | 378.6±247                   | 539±261.1         | 474.9±570.2    | 636.7±545.3              | 0.42               |                                |

*Online supplements are not copyedited prior to posting.*

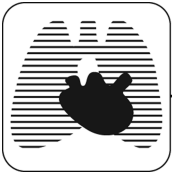

|             |             |             |             |             |       |         |
|-------------|-------------|-------------|-------------|-------------|-------|---------|
| IP-10       | 142.9±165   | 102.1±121   | 112.7±246   | 61.63±52.4  | 0.63  |         |
| MCP-1       | 201.7±187   | 196.6±110   | 37.06±42    | 189.3±215   | 0.11  | HNS-CS  |
| MIP-1β      | 12.59±7.87  | 11.5±3.95   | 9.778±4.22  | 14.04±8.47  | 0.56  |         |
| MIP-α       | 10.59±2.59  | 10.72±4.95  | 10.95±4.03  | 13.42±7.56  | 0.43  |         |
| PDGA- AA BB | 71.53±39.78 | 58.13±13.6  | 37.56±28.07 | 99.04±111.2 | 0.18  |         |
| PDGF- AA BB | 14.97±7.80  | 19.75±19.02 | 9.±2.392    | 23.5±27.7   | 0.23  |         |
| RANTES      | 18.64±24.82 | 22.83±26.92 | 19.33±37.9  | 392.4±737   | 0.039 | HNS-CFS |
| sCD40-L     | 4.281±2.30  | 4.11±1.26   | 3.3±1.05    | 7.38±7.68   | 0.11  |         |
| TGF-α       | 10.53±4.01  | 11±2.23     | 11.11±3.29  | 12.07±6.80  | 0.85  |         |
| TNF-α       | 10.24±6.03  | 8.357±1.88  | 6.55±2.69   | 8.53±6.40   | 0.37  |         |
| VEGF        | 18.76±6.02  | 16.56±8.65  | 14.28±6.57  | 14.43±7.33  | 0.29  |         |

*Online supplements are not copyedited prior to posting.*
